# Supplementary material for: Digestive Adaptations of Both the Fore- and Hind-gut in a Temperate Colobine Monkey
Source: Research Square preprint supplement (doi:10.21203/rs.3.rs-495936/v1), 2021-05-12
Supplement: Supplementary file 1 [file 009b1005bd84481a04e21997.xlsx]

## Sheet: genuTaxa
Table S4. Genus level microbes that were significant different between foregut and hindgut
TaxaID	foregut	hindgut	foregut/hindgut ratio	log ratio
Monoglobus	2.16188e-13	0.0387463	5.57958e-12	-11.2534
UCG-002	2.16188e-13	0.0313122	6.90429e-12	-11.1609
UCG-010_norank	2.16188e-13	0.0307257	7.03606e-12	-11.1527
Coprococcus	2.16188e-13	0.0304114	7.10879e-12	-11.1482
Lachnospiraceae NK4A136 group	2.16188e-13	0.0220881	9.78753e-12	-11.0093
Lachnoclostridium	2.16188e-13	0.019928	1.08484e-11	-10.9646
Clostridium sensu stricto 1	2.16188e-13	0.0156304	1.38313e-11	-10.8591
Phascolarctobacterium	2.16188e-13	0.0127317	1.69803e-11	-10.7701
Rikenellaceae_uncultured	2.16188e-13	0.0106878	2.02276e-11	-10.6941
Roseburia	2.16188e-13	0.0105401	2.05111e-11	-10.688
Veillonellales-Selenomonadales_norank	2.16188e-13	0.00905648	2.38711e-11	-10.6221
Marvinbryantia	2.16188e-13	0.00894569	2.41668e-11	-10.6168
Faecalibacterium	2.16188e-13	0.00800617	2.70027e-11	-10.5686
Blautia	2.16188e-13	0.00707926	3.05382e-11	-10.5152
Oscillospiraceae_uncultured	2.16188e-13	0.00695225	3.10961e-11	-10.5073
Family XIII AD3011 group	2.16188e-13	0.00639917	3.37838e-11	-10.4713
Anaeroplasma	2.16188e-13	0.0047093	4.59067e-11	-10.3381
Peptococcaceae_uncultured	2.16188e-13	0.00462102	4.67836e-11	-10.3299
[Eubacterium] ventriosum group	2.16188e-13	0.00451023	4.79329e-11	-10.3194
dgA-11 gut group	2.16188e-13	0.0042499	5.0869e-11	-10.2935
Dorea	2.16188e-13	0.00411298	5.25624e-11	-10.2793
Bacteroides	2.16188e-13	0.00409947	5.27357e-11	-10.2779
Ruminococcaceae_uncultured	2.16188e-13	0.00398417	5.42618e-11	-10.2655
Clostridia_Unclassified	2.16188e-13	0.00382293	5.65504e-11	-10.2476
Helicobacter	2.16188e-13	0.00372474	5.80411e-11	-10.2363
F0058	2.16188e-13	0.00363647	5.94501e-11	-10.2258
Tyzzerella	2.16188e-13	0.00357341	6.04991e-11	-10.2183
Eggerthella	2.16188e-13	0.00352207	6.13811e-11	-10.212
Paeniclostridium	2.16188e-13	0.0034491	6.26796e-11	-10.2029
Enterobacteriaceae_Unclassified	2.16188e-13	0.00338244	6.39148e-11	-10.1944
Akkermansia	2.16188e-13	0.00313473	6.89655e-11	-10.1614
UCG-009	2.16188e-13	0.00311851	6.93241e-11	-10.1591
Brachyspira	2.16188e-13	0.00295908	7.30594e-11	-10.1363
Colidextribacter	2.16188e-13	0.00274289	7.88177e-11	-10.1034
Oscillospiraceae_Unclassified	2.16188e-13	0.00273928	7.89214e-11	-10.1028
[Ruminococcus] torques group	2.16188e-13	0.00242941	8.89878e-11	-10.0507
Anaerostipes	2.16188e-13	0.00238618	9.06002e-11	-10.0429
Izemoplasmatales_norank	2.16188e-13	0.00233573	9.25569e-11	-10.0336
Olivibacter	2.16188e-13	0.00221323	9.76801e-11	-10.0102
Erysipelotrichaceae UCG-003	2.16188e-13	0.00213396	1.01309e-10	-9.99435
Clostridia_norank	2.16188e-13	0.00177815	1.21581e-10	-9.91514
Frisingicoccus	2.16188e-13	0.00129713	1.66667e-10	-9.77815
Parasutterella	2.16188e-13	0.00125209	1.72662e-10	-9.7628
Klebsiella	2.16188e-13	0.00106112	2.03735e-10	-9.69093
[Ruminococcus] gauvreauii group	2.16188e-13	0.000968343	2.23256e-10	-9.6512
[Eubacterium] siraeum group	2.16188e-13	0.000852142	2.537e-10	-9.59568
Anaerovoracaceae_Unclassified	2.16188e-13	0.000803499	2.69058e-10	-9.57015
Tuzzerella	2.16188e-13	0.000718826	3.00752e-10	-9.52179
Incertae Sedis	2.16188e-13	0.000698108	3.09677e-10	-9.50909
Candidatus Stoquefichus	2.16188e-13	0.000583708	3.7037e-10	-9.43136
Dielma	2.16188e-13	0.000549478	3.93443e-10	-9.40512
Ruminococcaceae_Unclassified	2.16188e-13	0.00049453	4.37158e-10	-9.35936
Alloprevotella	2.16188e-13	0.000451293	4.79042e-10	-9.31963
[Anaerorhabdus] furcosa group	2.16188e-13	0.000444987	4.8583e-10	-9.31352
Lachnospiraceae UCG-010	2.16188e-13	0.000430575	5.02092e-10	-9.29922
Papillibacter	2.16188e-13	0.000410758	5.26316e-10	-9.27875
Anaerofustis	2.16188e-13	0.00036752	5.88235e-10	-9.23045
Escherichia-Shigella	2.16188e-13	0.000312572	6.91643e-10	-9.16012
Oscillibacter	2.16188e-13	0.000301763	7.16418e-10	-9.14483
Romboutsia	2.16188e-13	0.000301763	7.16418e-10	-9.14483
UCG-003	2.16188e-13	0.000290052	7.45342e-10	-9.12764
Paracaedibacteraceae_uncultured	2.16188e-13	0.000226998	9.52381e-10	-9.02119
Peptococcus	2.16188e-13	0.000194569	1.11111e-09	-8.95424
Ruminococcaceae_norank	2.16188e-13	0.000168447	1.28342e-09	-8.89163
Gordonibacter	2.16188e-13	0.000165744	1.30435e-09	-8.88461
Flavonifractor	2.16188e-13	0.000151332	1.42857e-09	-8.8451
UCG-007	2.16188e-13	0.000136018	1.5894e-09	-8.79877
Eggerthellaceae_uncultured	2.16188e-13	0.000122507	1.76471e-09	-8.75333
Caldicoprobacter	2.16188e-13	8.82768e-05	2.44898e-09	-8.61101
Collinsella	2.16188e-13	7.65666e-05	2.82353e-09	-8.54921
Turicibacter	2.16188e-13	7.11619e-05	3.03797e-09	-8.51742
Bacteroidales_Unclassified	2.16188e-13	6.6658e-05	3.24324e-09	-8.48902
p-251-o5_norank	2.16188e-13	6.6658e-05	3.24324e-09	-8.48902
Butyricicoccus	2.16188e-13	6.21541e-05	3.47826e-09	-8.45864
Elusimicrobium	2.16188e-13	5.67494e-05	3.80952e-09	-8.41913
Pseudobacteroides	2.16188e-13	5.49478e-05	3.93443e-09	-8.40512
Erysipelatoclostridiaceae_uncultured	2.16188e-13	4.594e-05	4.70588e-09	-8.32736
Enterobacter	2.16188e-13	4.14361e-05	5.21739e-09	-8.28255
p-2534-18B5 gut group_norank	2.16188e-13	3.42298e-05	6.31579e-09	-8.19957
Bacillus	2.16188e-13	3.24282e-05	6.66667e-09	-8.17609
Adlercreutzia	2.16188e-13	3.15274e-05	6.85714e-09	-8.16386
Atopobiaceae_uncultured	2.16188e-13	6.30549e-06	3.42857e-08	-7.46489
Breznakia	2.16188e-13	4.50392e-06	4.8e-08	-7.31876
Christensenellaceae R-7 group	5.90914e-05	0.0783367	0.000754326	-3.12244
Rikenellaceae RC9 gut group	4.03551e-05	0.0453455	0.000889948	-3.05064
Clostridia vadinBB60 group_norank	2.73838e-05	0.00816651	0.00335319	-2.47454
UCG-005	0.000399227	0.0747435	0.0053413	-2.27235
Campylobacter	9.6564e-05	0.0122002	0.00791494	-2.10155
Muribaculaceae_norank	0.00131587	0.139921	0.00940437	-2.02667
[Eubacterium] coprostanoligenes group_norank	0.00125677	0.0383527	0.0327689	-1.48454
NK4A214 group	0.00193993	0.0243428	0.0796921	-1.09858
[Eubacterium] brachy group	4.46789e-05	0.000485523	0.0920223	-1.03611
Lachnospira	5.18852e-05	0.000499034	0.103971	-0.983087
Fibrobacter	2.59426e-05	0.000202676	0.128	-0.89279
Unclassified	0.000123948	0.000946724	0.130923	-0.882984
RF39_norank	0.000739364	0.00364367	0.202917	-0.692681
Erysipelotrichaceae_Unclassified	3.74726e-05	0.000117102	0.32	-0.49485
Libanicoccus	5.04439e-05	0.000122507	0.411765	-0.385351
Lachnospiraceae_uncultured	0.00248328	0.00580735	0.42761	-0.368952
Sphaerochaeta	7.06215e-05	0.000151332	0.466667	-0.330993
Prevotellaceae UCG-004	0.00026375	0.000500836	0.526619	-0.278504
Ruminococcus	0.00959155	0.0156827	0.611603	-0.213531
Lachnospiraceae UCG-001	0.00129569	0.00207631	0.624035	-0.204791
Clostridia UCG-014_norank	0.0312594	0.0478551	0.653209	-0.184948
Lachnospiraceae_Unclassified	0.0632293	0.0805148	0.785313	-0.104957
DNF00809	0.000172951	0.000214387	0.806723	-0.0932757
UCG-004	2.16188e-05	2.61227e-05	0.827586	-0.0821868
Anaerosporobacter	2.16188e-13	2.16188e-13	1	0
Arthrobacter	2.16188e-13	2.16188e-13	1	0
Bacillaceae_uncultured	2.16188e-13	2.16188e-13	1	0
Cellulosilyticum	2.16188e-13	2.16188e-13	1	0
Clostridioides	2.16188e-13	2.16188e-13	1	0
Clostridium sensu stricto 13	2.16188e-13	2.16188e-13	1	0
Coriobacteriales Incertae Sedis_uncultured	2.16188e-13	2.16188e-13	1	0
Epulopiscium	2.16188e-13	2.16188e-13	1	0
Erysipelotrichales_norank	2.16188e-13	2.16188e-13	1	0
Lysinibacillus	2.16188e-13	2.16188e-13	1	0
Mogibacterium	2.16188e-13	2.16188e-13	1	0
Oceanobacillus	2.16188e-13	2.16188e-13	1	0
Paraclostridium	2.16188e-13	2.16188e-13	1	0
[Eubacterium] xylanophilum group	2.16188e-13	2.16188e-13	1	0
Family XIII UCG-001	0.00131731	0.00124398	1.05894	0.0248725
Bradymonadales_norank	0.000223394	0.000143225	1.55975	0.193055
Olsenella	0.0135982	0.0081602	1.66641	0.221782
Treponema	0.0100715	0.00541281	1.86068	0.269671
Parvibacter	0.00205955	0.000962938	2.13882	0.330175
Prevotellaceae UCG-001	0.00759253	0.00315635	2.40548	0.381202
Lachnospiraceae NC2004 group	0.00552289	0.00193398	2.85571	0.455713
Streptococcus	0.000121065	2.97259e-05	4.07273	0.609885
Enterorhabdus	0.000523175	0.000108995	4.8	0.681241
Rhodospirillales_norank	0.00188948	0.000286449	6.59623	0.819296
[Eubacterium] ruminantium group	0.011334	0.00162051	6.99411	0.844732
Gastranaerophilales_norank	0.00245734	0.000270235	9.09333	0.958723
Pseudoramibacter	0.00159403	0.000174752	9.12165	0.960073
Acetitomaculum	0.043252	0.00416793	10.3774	1.01609
Solobacterium	0.00799608	0.000755758	10.5802	1.02449
Erysipelotrichaceae UCG-002	0.0031967	0.000223394	14.3097	1.15563
Prevotella	0.494591	0.0235843	20.9712	1.32162
Acinetobacter	0.000732157	2.97259e-05	24.6303	1.39147
Gammaproteobacteria_Unclassified	0.000393462	1.17102e-05	33.6	1.52634
[Eubacterium] nodatum group	0.00247031	6.6658e-05	37.0595	1.5689
Saccharimonadales_norank	0.000784042	1.35118e-05	58.0267	1.76363
Mitsuokella	0.0144688	6.84596e-05	211.347	2.325
Megasphaera	0.0249178	9.72847e-05	256.133	2.40847
Dialister	0.0445679	0.000104491	426.524	2.62994
Lactobacillus	0.0654142	1.2611e-05	5187.09	3.71492
Paenibacillus	1.00888e-05	2.16188e-13	4.66667e+07	7.66901
Mannheimia	1.153e-05	2.16188e-13	5.33333e+07	7.727
UCG-012	1.29713e-05	2.16188e-13	60000000	7.77815
Alphaproteobacteria_Unclassified	1.58538e-05	2.16188e-13	7.33333e+07	7.8653
Prevotellaceae_Unclassified	2.73838e-05	2.16188e-13	1.26667e+08	8.10266
Salmonella	3.31489e-05	2.16188e-13	1.53333e+08	8.18564
Oxalobacter	3.74726e-05	2.16188e-13	1.73333e+08	8.23888
Coriobacterium	4.46789e-05	2.16188e-13	2.06667e+08	8.31527
Spirochaetaceae_Unclassified	5.33264e-05	2.16188e-13	2.46667e+08	8.39211
Bifidobacterium	5.62089e-05	2.16188e-13	2.6e+08	8.41497
Spirochaetaceae_uncultured	7.9269e-05	2.16188e-13	3.66667e+08	8.56427
Sporosarcina	9.22403e-05	2.16188e-13	4.26667e+08	8.63009
Eubacterium	0.000116742	2.16188e-13	5.4e+08	8.73239
Succinivibrio	0.000122507	2.16188e-13	5.66667e+08	8.75333
Erysipelotrichaceae UCG-007	0.000148449	2.16188e-13	6.86667e+08	8.83675
Erysipelotrichaceae UCG-009	0.000206099	2.16188e-13	9.53333e+08	8.97924
Erysipelotrichaceae UCG-006	0.000249337	2.16188e-13	1.15333e+09	9.06195
Selenomonas	0.00028681	2.16188e-13	1.32667e+09	9.12276
Mucispirillum	0.000306987	2.16188e-13	1420000000	9.15229
Desulfovibrionaceae_uncultured	0.000340136	2.16188e-13	1.57333e+09	9.19682
Coriobacteriales_norank	0.000383374	2.16188e-13	1.77333e+09	9.24879
Fretibacterium	0.000451113	2.16188e-13	2.08667e+09	9.31945
Desulfovibrio	0.000547677	2.16188e-13	2.53333e+09	9.40369
Prevotellaceae NK3B31 group	0.000582267	2.16188e-13	2.69333e+09	9.43029
Oribacterium	0.000987259	2.16188e-13	4.56667e+09	9.6596
Allisonella	0.00116453	2.16188e-13	5.38667e+09	9.73132
Rs-H88 termite group	0.00165312	2.16188e-13	7.64667e+09	9.88347
Candidatus Saccharimonas	0.00173239	2.16188e-13	8.01333e+09	9.90381
Atopobium	0.00300357	2.16188e-13	1.38933e+10	10.1428
Lachnospiraceae NK3A20 group	0.0101234	2.16188e-13	4.68267e+10	10.6705
Acidaminococcus	0.0128214	2.16188e-13	5.93067e+10	10.7731
Selenomonadaceae_uncultured	0.0154416	2.16188e-13	7.14267e+10	10.8539
Selenomonadaceae_Unclassified	0.0206892	2.16188e-13	95700000000	10.9809
Syntrophococcus	0.0246685	2.16188e-13	1.14107e+11	11.0573
Shuttleworthia	0.0278133	2.16188e-13	1.28653e+11	11.1094
